# Supplementary material
Source: publisher site journal article supplement (https://www.dovepress.com/article/124034)
Supplement: Supplementary file 1 [file get_supplementary_file.php]

## **Bioequivalence study of a new sildenafil 100 mg orodispersible film compared to the conventional film-coated 100 mg tablet administered to healthy male volunteers**

### **Appendix 1**

#### **Analytical procedures used to determine drug concentrations**

A 0.1 mL aliquot of human plasma sample was mixed with internal standard working solution (stable isotope-labeled sildenafil and N-desmethyl-sildenafil at a concentration of 400 ng/mL) and 0.3 mL of sodium chloride solution were added and mixed. The resulting solution was vortexed and extracted with methyl tert-butyl ether (2.5 mL). The upper organic layer was separated, evaporated and the drug was reconstituted in 0.2 mL of the starting LC solvent and injected on a high-performance liquid chromatography system (Shimadzu Nexera LC30; 's Hertogenbosch, The Netherlands) coupled with an AB SCIEX Triple Quad 4000 LC-MS/MS (Nieuwerkerk aan den IJssel, The Netherlands).

Liquid chromatographic separations were achieved using a Waters Xterra MS C18 column (100 × 4.6 mm, 3.5 µm; Waters, Etten-Leur, The Netherlands). The column and auto sampler tray temperature were kept constant at 40°C and 8°C, respectively. The mobile phase consisted of an ammonium formate buffer (0.2 mol/L, pH 4.0) (A) water (B) and methanol (C) and was delivered at a flow-rate of 1.0 ml/min by using a gradient. The buffer (A) was set to 10% and a gradient was set for solvents B and C: starting with 35% B [0–0.5 min] followed by a linear gradient to 15% B [0.5–3.0 min], equilibration for 1.5 min [3.0–4.5 min], followed by a linear gradient from 15% to 35% B [4.5–4.6 min] and finally to equilibration for 1.4% at the starting percentage. The sample injection volume was 20 µL. Quantification was achieved with MS–MS detection in positive ion mode equipped with a Turbo ionspray interface set at 700°C. The ion spray voltage was set at 5000 V. The source parameters: curtain gas ion source gas 1 and 2, and collision gas were set at 30, 80, 80, and 8 psi, respectively. Detection of the ions was carried out in the multiple-reaction monitoring mode, by monitoring the following *m/z* transitions: sildenafil 475 → 100, N-desmethyl-sildenafil 461 → 85, stable isotope labeled internal standard of sildenafil 483 → 108 and stable isototope labeled internal standard of N-desmethyl-sildenafil 469 → 93. Quadrupoles Q1 and Q3 were set on unit resolution. The analysis data obtained were processed by Analyst software version 1.5.2.

The LC-MS/MS method for the determination of sildenafil and N-desmethyl sildenafil in human plasma was developed and validated according to the requirements of the FDA Guidance for

Industry,<sup>1</sup> and the EMA guidance on bioanalytical method validation.<sup>2</sup> The methods adhered to the regulatory requirements for selectivity, sensitivity, precision, accuracy, recovery, carryover, matrix effect, and stability. The precision and accuracy (expressed as % bias) of the lower limit of quantification (0.5 ng/mL) was 4.7% and -4.2% for sildenafil and 6.6% and -6.0% for N-desmethyl-sildenafil, respectively. Chromatograms of the lower limit of quantification of sildenafil and N-desmethyl-sildenafil are shown in Figures 1 and 2. The data indicate that the method could be applied to the analysis of clinical samples in bioequivalence studies.

## References

1. U.S. Department of Health and Human Services, Food and Drug Administration, Center for Drug Evaluation and Research (CDER), Center for Veterinary Medicine (CVM). Guidance for Industry: Bioanalytical Method Validation. May 2001.
2. European Medicines Agency (EMA), Committee for Medicinal Products for Human Use (CHMP). Guideline on bioanalytical method validation. EMEA/CHMP/EWP/192217/2009, 21 July 2011.

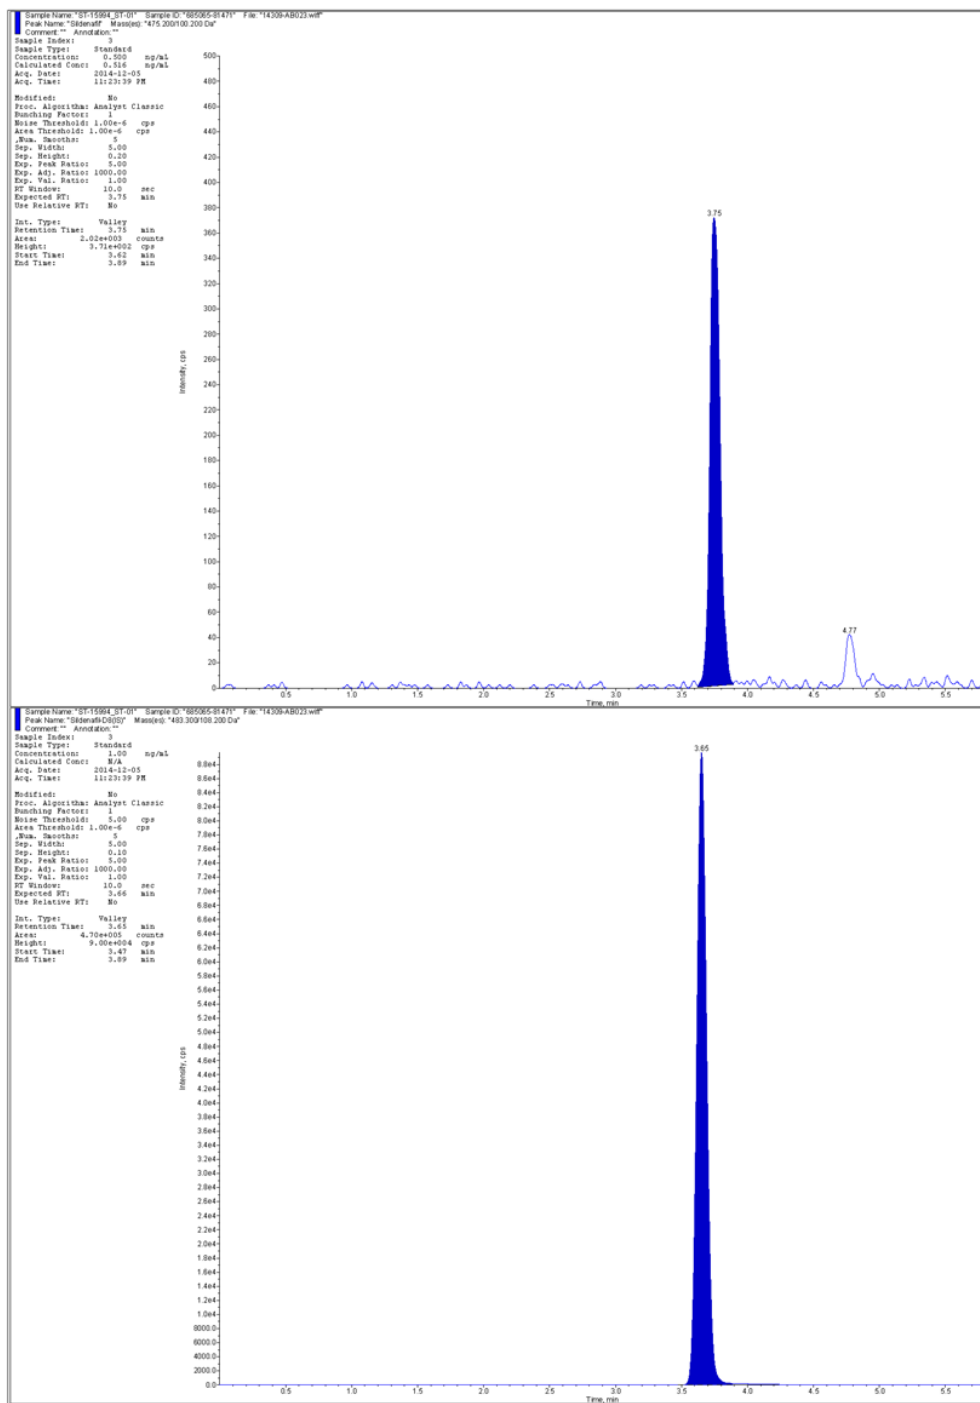

**Figure 1** Chromatogram of a LLOQ sample where the upper chromatogram is for sildenafil (MRM transition: 475 → 100) and the lower chromatogram is for its stable isotope labeled internal standard (MRM transition: 483 → 108).

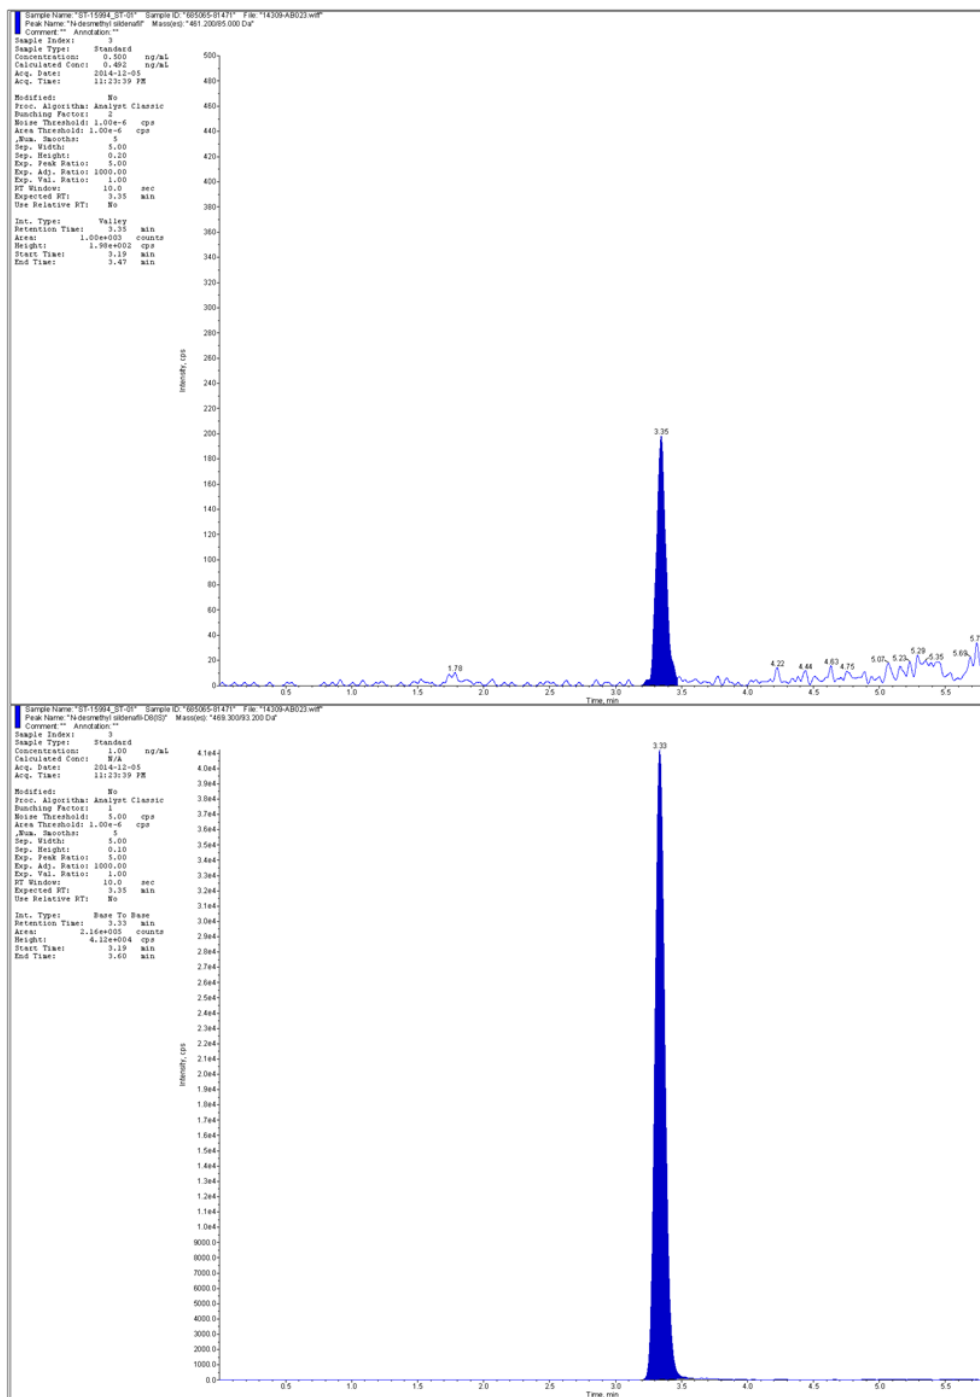

**Figure 2** Chromatogram of a LLOQ sample where the upper chromatogram is for N-desmethyl-sildenafil (MRM transition: 461 → 85) and the lower chromatogram is for its stable isotope labeled internal standard (MRM transition: 469 → 93).
